# Supplementary material for: Authenticity screening of stained glass windows using optical spectroscopy
Source: PubMed Central journal article supplement (PMC5121600; doi:10.1038/srep37726), 2016-11-24
Supplement: srep37726-s1.pdf [file srep37726-s1.pdf]

# Authenticity screening of stained glass windows using optical spectroscopy

Wendy Meulebroeck<sup>1,\*,+</sup>, Hilde Wouters<sup>1,2,+</sup>, Karin Nys<sup>2</sup>, and Hugo Thienpont<sup>1</sup>

1 Vrije Universiteit Brussel, Applied Physics and Photonics Department, Brussels Photonics Team B-PHOT, Brussels, 1050, Belgium

2 Vrije Universiteit Brussel, Department of Art Studies and Archaeology, Brussels, 1050, Belgium

\* [wmeulebr@vub.ac.be](mailto:wmeulebr@vub.ac.be)

+ these authors contributed equally to this work

**Supplementary Table 1. Spectral features of all measured panes.**

## Pot-coloured / blue

| Sample    | x    | y    | Colour        | Position Co <sup>2+</sup><br>1st absorption band<br>(±1.4 nm) | Position transmission<br>maximum (±1.4 nm) | Additional bands (±1.4 nm)                                                                |
|-----------|------|------|---------------|---------------------------------------------------------------|--------------------------------------------|-------------------------------------------------------------------------------------------|
| <b>B1</b> |      |      |               |                                                               |                                            |                                                                                           |
| 54-5      | 0.15 | 0.06 | purplish blue | 534.0                                                         | 456.0                                      | * strong IR Co <sup>2+</sup> bands (1225.0, 1266.0, 1483.5)<br>* Cu <sup>2+</sup> (838.0) |
| <b>B2</b> |      |      |               |                                                               |                                            |                                                                                           |
| 55-2      | 0.15 | 0.17 | blue          | 535.5                                                         | 463.5                                      | -                                                                                         |
| 55-4A     | 0.16 | 0.18 | blue          | 532.5                                                         | 459.0                                      | -                                                                                         |
| 55-6      | 0.16 | 0.18 | blue          | 531.0                                                         | 460.5                                      | -                                                                                         |
| 55-8      | 0.17 | 0.19 | blue          | 532.5                                                         | 459.0                                      | -                                                                                         |
| 55-11     | 0.16 | 0.18 | blue          | 537.0                                                         | 460.5                                      | -                                                                                         |
| 55-12     | 0.15 | 0.16 | blue          | 535.5                                                         | 460.5                                      | -                                                                                         |
| 55-16     | 0.16 | 0.18 | blue          | 534.0                                                         | 457.5                                      | -                                                                                         |
| 55-18     | 0.16 | 0.17 | blue          | 534.0                                                         | 460.5                                      | -                                                                                         |
| 55-22     | 0.17 | 0.19 | blue          | 535.5                                                         | 460.5                                      | -                                                                                         |
| 55-24     | 0.15 | 0.16 | blue          | 532.5                                                         | 459.0                                      | -                                                                                         |

|                     |      |      |      |       |       |                        |
|---------------------|------|------|------|-------|-------|------------------------|
| 55-27               | 0.17 | 0.20 | blue | 534.0 | 457.5 | -                      |
| 55-29               | 0.16 | 0.18 | blue | 535.5 | 459.0 | -                      |
| 55-32               | 0.18 | 0.22 | blue | 535.5 | 457.5 | -                      |
| <b>B3</b>           |      |      |      |       |       |                        |
| 55-4B<br>(restored) | 0.18 | 0.20 | blue | 534.0 | 393.0 | weak band around 440.0 |

**Pot-coloured / green**

| Sample               | x    | y    | Colour          | Cr <sup>3+</sup> absorption bands present? | Cr <sup>6+</sup> absorption bands present? | Position transmission maximum (±1.4 nm) |
|----------------------|------|------|-----------------|--------------------------------------------|--------------------------------------------|-----------------------------------------|
| <b>G1</b>            |      |      |                 |                                            |                                            |                                         |
| 54-11                | 0.33 | 0.51 | yellowish-green | yes                                        | yes                                        | 541.5                                   |
| 54-16                | 0.33 | 0.51 | yellowish-green | yes                                        | yes                                        | 541.5                                   |
| 54-23                | 0.31 | 0.50 | yellowish-green | yes                                        | yes                                        | 537.0                                   |
| 54-26                | 0.33 | 0.52 | yellowish-green | yes                                        | yes                                        | 541.5                                   |
| 54-31A               | 0.31 | 0.50 | yellowish-green | yes                                        | yes                                        | 537.0                                   |
| 54-37                | 0.32 | 0.51 | yellowish-green | yes                                        | yes                                        | 540.0                                   |
| 54-47                | 0.32 | 0.49 | yellowish-green | yes                                        | yes                                        | 538.5                                   |
| 54-48                | 0.31 | 0.52 | yellowish-green | yes                                        | yes                                        | 537.0                                   |
| <b>G2</b>            |      |      |                 |                                            |                                            |                                         |
| 54-31B<br>(restored) | 0.32 | 0.46 | yellowish-green | yes                                        | yes                                        | 522.5 & 553.5                           |

**Pot-coloured / yellow**

| Sample    | x    | y    | Colour | Observed ions & absorption positions (±1.4 nm)                   | Position transmission maximum (±1.4 nm) |
|-----------|------|------|--------|------------------------------------------------------------------|-----------------------------------------|
| <b>Y1</b> |      |      |        |                                                                  |                                         |
| 54-1      | 0.54 | 0.45 | yellow | Fe <sup>2+</sup> (993.0) Co <sup>2+</sup> (640.5, 648.0)         | 712.5                                   |
| 54-9A     | 0.49 | 0.46 | yellow | Fe <sup>2+</sup> (994.5) Co <sup>2+</sup> (639.0, 645.0)         | 717.0                                   |
| 54-18     | 0.49 | 0.46 | yellow | Fe <sup>2+</sup> (985.5) Co <sup>2+</sup> (642.0, 649.5)         | 715.5                                   |
| 54-21     | 0.52 | 0.46 | yellow | Fe <sup>2+</sup> (1024.5) Co <sup>2+</sup> (640.5, 646.5)        | 709.5                                   |
| 54-27     | 0.48 | 0.46 | yellow | Fe <sup>2+</sup> (1087.5) Co <sup>2+</sup> (639.0, 645.0, 648.0) | 709.5                                   |
| 54-30     | 0.48 | 0.46 | yellow | Fe <sup>2+</sup> (1053.0) Co <sup>2+</sup> (643.5, 648.0, 651.0) | 708.0                                   |
| 54-38     | 0.48 | 0.46 | yellow | Fe <sup>2+</sup> (1053.0) Co <sup>2+</sup> (643.5, 652.5)        | 712.5                                   |
| 54-49     | 0.49 | 0.46 | yellow | Fe <sup>2+</sup> (1030.5) Co <sup>2+</sup> (646.5, 651.0)        | 711.0                                   |
| <b>Y2</b> |      |      |        |                                                                  |                                         |

|                     |      |      |                |                                                                  |                                    |
|---------------------|------|------|----------------|------------------------------------------------------------------|------------------------------------|
| 54-46               | 0.49 | 0.46 | yellow         | Fe <sup>2+</sup> (1053.0) Co <sup>2+</sup> (639.0, 643.5, 646.5) | 697.5                              |
| <b>Y3</b>           |      |      |                |                                                                  |                                    |
| 54-9B<br>(restored) | 0.49 | 0.46 | yellow         | Fe <sup>3+</sup> (417.0)                                         | convergence (near-infrared region) |
| 54-22<br>(restored) | 0.51 | 0.44 | yellow         | Fe <sup>3+</sup> (381.0, 420.0)                                  | convergence (near-infrared region) |
| <b>Y4</b>           |      |      |                |                                                                  |                                    |
| 55-1                | 0.38 | 0.39 | yellow / white | Fe <sup>3+</sup> (417.0) Cu <sup>2+</sup> (822.0)                | 606.0                              |
| 55-9                | 0.42 | 0.43 | yellow / white | Fe <sup>3+</sup> (415.5) Cu <sup>2+</sup> (829.5)                | 613.5                              |
| 55-13               | 0.41 | 0.43 | yellow / white | Fe <sup>3+</sup> (415.5) Cu <sup>2+</sup> (853.5)                | 601.5                              |
| 55-14               | 0.41 | 0.44 | yellow / white | Fe <sup>3+</sup> (417.0) Cu <sup>2+</sup> (825.0)                | 600.0                              |
| 55-15               | 0.42 | 0.43 | yellow / white | Fe <sup>3+</sup> (417.0) Cu <sup>2+</sup> (823.5)                | 621.0                              |
| 55-19               | 0.38 | 0.40 | yellow / white | Fe <sup>3+</sup> (417.0) Cu <sup>2+</sup> (826.5)                | 610.5                              |
| 55-20               | 0.39 | 0.40 | yellow / white | Fe <sup>3+</sup> (417.0) Cu <sup>2+</sup> (820.5)                | 615.0                              |
| 55-21               | 0.40 | 0.42 | yellow / white | Fe <sup>3+</sup> (417.0) Cu <sup>2+</sup> (823.5)                | 609.0                              |
| 55-25               | 0.39 | 0.41 | yellow / white | Fe <sup>3+</sup> (417.0) Cu <sup>2+</sup> (825.0)                | 607.5                              |
| 55-26               | 0.40 | 0.42 | yellow / white | Fe <sup>3+</sup> (417.0) Cu <sup>2+</sup> (837.0)                | 597.0                              |
| 55-30               | 0.39 | 0.41 | yellow / white | Fe <sup>3+</sup> (417.0) Cu <sup>2+</sup> (810.0)                | 613.5                              |
| 55-31               | 0.39 | 0.41 | yellow / white | Fe <sup>3+</sup> (417.0) Cu <sup>2+</sup> (823.5)                | 595.5                              |
| 55-33               | 0.40 | 0.42 | yellow / white | Fe <sup>3+</sup> (417.0) Cu <sup>2+</sup> (850.5)                | 580.5                              |
| <b>Y5</b>           |      |      |                |                                                                  |                                    |
| 55-10               | 0.38 | 0.38 | yellow / white | Fe <sup>3+</sup> (420.0)                                         | 685.5                              |

**Flashed / red**

| Sample            | <i>x</i> | <i>y</i> | Colour         | SPR peak position & FWHM (nm) | Average particle radius <i>R</i> (nm) | Strength band linked to presence isolated Cu <sup>0</sup> atoms (~ 430 nm) |
|-------------------|----------|----------|----------------|-------------------------------|---------------------------------------|----------------------------------------------------------------------------|
| <b>R Koksijde</b> |          |          |                |                               |                                       |                                                                            |
| 54-10             | 0.59     | 0.35     | reddish-orange | 562.5 & 24.0                  | 11.0                                  | absent                                                                     |
| 54-13             | 0.65     | 0.33     | reddish-orange | 564.0 & 24.0                  | 11.0                                  | weak                                                                       |
| 54-14             | 0.52     | 0.36     | reddish-orange | 562.5 & 24.0                  | 11.0                                  | absent                                                                     |
| 54-17             | 0.60     | 0.34     | reddish-orange | 562.5 & 21.3                  | 12.4                                  | absent                                                                     |
| 54-19             | 0.68     | 0.32     | reddish-orange | 562.5 & 24.8                  | 10.6                                  | weak                                                                       |
| 54-20             | 0.68     | 0.32     | reddish-orange | 562.5 & 25.0                  | 10.5                                  | weak                                                                       |
| 54-32             | 0.61     | 0.34     | reddish-orange | 564.0 & 23.5                  | 11.3                                  | absent                                                                     |
| 54-36             | 0.59     | 0.34     | reddish-orange | 564.0 & 23.0                  | 11.5                                  | absent                                                                     |

|       |      |      |                |              |      |        |
|-------|------|------|----------------|--------------|------|--------|
| 54-40 | 0.68 | 0.32 | reddish-orange | 564.0 & 27.8 | 9.5  | weak   |
| 54-44 | 0.70 | 0.30 | reddish-orange | 562.5 & 23.8 | 11.1 | strong |

**Other sites**

***Dendermonde (potash)***

|   |      |      |                |              |      |        |
|---|------|------|----------------|--------------|------|--------|
| 1 | 0.69 | 0.31 | reddish-orange | 560.5 & 30.0 | 8.7  | strong |
| 2 | 0.69 | 0.31 | reddish-orange | 562.0 & 15.0 | 17.5 | strong |

***Bruges (HLLA)***

|       |      |      |                |              |      |        |
|-------|------|------|----------------|--------------|------|--------|
| B6s36 | 0.71 | 0.29 | reddish-orange | 571.0 & 16.5 | 16.5 | strong |
| B6s37 | 0.70 | 0.30 | reddish-orange | 571.5 & 39.0 | 7.0  | strong |
| A6s50 | 0.70 | 0.29 | reddish-orange | 573.0 & 29.0 | 9.4  | weak   |
| C6s54 | 0.70 | 0.30 | reddish-orange | 574.5 & 30.0 | 9.2  | strong |

***Bruges (soda)***

|      |      |      |                |              |      |        |
|------|------|------|----------------|--------------|------|--------|
| A3s2 | 0.70 | 0.30 | reddish-orange | 564.0 & 23.5 | 11.3 | strong |
|------|------|------|----------------|--------------|------|--------|

***Glashütte Lamberts (soda)***

|              |      |      |                |              |      |        |
|--------------|------|------|----------------|--------------|------|--------|
| 1001U Hell   | 0.60 | 0.34 | reddish-orange | 564.0 & 23.0 | 11.5 | absent |
| 1001U Mittel | 0.69 | 0.31 | reddish-orange | 562.5 & 21.3 | 12.4 | strong |

**Naturally coloured**

| Sample    | x    | y    | Colour | Observed ions & absorption positions ( $\pm 1.4$ nm)                                                      | Position transmission maximum ( $\pm 1.4$ nm) |
|-----------|------|------|--------|-----------------------------------------------------------------------------------------------------------|-----------------------------------------------|
| <b>N1</b> |      |      |        |                                                                                                           |                                               |
| 54-41     | 0.36 | 0.40 | white  | Fe <sup>3+</sup> (379.5) Cr <sup>3+</sup> (439.5, 636.0, 657.0, 684.0)                                    | 405.0 & 555.0                                 |
| 54-43     | 0.36 | 0.40 | white  | Fe <sup>3+</sup> (375.0) Cr <sup>3+</sup> (441.0, 636.0, 655.5, 684.0)                                    | 405.0 & 556.5                                 |
| 55-3      | 0.34 | 0.37 | white  | Fe <sup>3+</sup> (381.0) Cr <sup>3+</sup> (445.5, 637.5, 655.5, 685.5)                                    | 397.5 & 547.5                                 |
| 55-5      | 0.34 | 0.37 | white  | Fe <sup>3+</sup> (379.5) Cr <sup>3+</sup> (439.5, 639.0, 657.0, 687.0)                                    | 397.5 & 547.5                                 |
| 55-7      | 0.34 | 0.38 | white  | Fe <sup>3+</sup> (378.0) Cr <sup>3+</sup> (444.0, 637.5, 657.0, 684.0)                                    | 397.5 & 550.5                                 |
| <b>N2</b> |      |      |        |                                                                                                           |                                               |
| 54-3      | 0.37 | 0.39 | white  | Fe <sup>3+</sup> (378.0, 417.0) Co <sup>2+</sup> (597.0, 649.5)<br>Cr <sup>3+</sup> (636.0, 655.5, 684.0) | 561.0                                         |
| 54-7      | 0.37 | 0.39 | white  | Fe <sup>3+</sup> (375.0, 417.0) Co <sup>2+</sup> (597.0, 651.0)<br>Cr <sup>3+</sup> (636.0, 655.5, 684.0) | 565.5                                         |
| 54-12     | 0.36 | 0.39 | white  | Fe <sup>3+</sup> (378.0, 417.0) Co <sup>2+</sup> (595.5, 649.5)<br>Cr <sup>3+</sup> (637.5, 655.5, 685.5) | 559.5                                         |
| 54-15     | 0.36 | 0.38 | white  | Fe <sup>3+</sup> (378.0, 417.0) Co <sup>2+</sup> (597.0, 649.5)<br>Cr <sup>3+</sup> (637.5, 655.5, 685.5) | 559.5                                         |

|           |      |      |       |                                                                                                           |       |  |
|-----------|------|------|-------|-----------------------------------------------------------------------------------------------------------|-------|--|
| 54-28     | 0.34 | 0.37 | white | Fe <sup>3+</sup> (378.0, 420.0) Co <sup>2+</sup> (595.5, 649.5)<br>Cr <sup>3+</sup> (639.0, 655.5, 685.5) | 556.5 |  |
| 54-29     | 0.34 | 0.37 | white | Fe <sup>3+</sup> (375.0, 420.0) Co <sup>2+</sup> (600.0, 649.5)<br>Cr <sup>3+</sup> (636.0, 655.5, 684.0) | 553.5 |  |
| 54-33     | 0.36 | 0.41 | white | Fe <sup>3+</sup> (378.0, 418.5) Co <sup>2+</sup> (597.0, 649.5)<br>Cr <sup>3+</sup> (637.5, 654.0, 684.0) | 565.5 |  |
| 54-35     | 0.37 | 0.42 | white | Fe <sup>3+</sup> (378.0, 418.5) Co <sup>2+</sup> (595.5, 649.5)<br>Cr <sup>3+</sup> (636.0, 655.5, 684.0) | 559.5 |  |
| 54-39     | 0.35 | 0.37 | white | Fe <sup>3+</sup> (375.0, 418.5) Co <sup>2+</sup> (598.5, 649.5)<br>Cr <sup>3+</sup> (636.0, 655.5, 682.5) | 558.0 |  |
| 54-45     | 0.35 | 0.38 | white | Fe <sup>3+</sup> (376.5, 417.0) Co <sup>2+</sup> (597.0, 649.5)<br>Cr <sup>3+</sup> (636.0, 655.5, 685.5) | 558.0 |  |
| 54-50     | 0.35 | 0.37 | white | Fe <sup>3+</sup> (376.5, 417.0) Co <sup>2+</sup> (597.0, 649.5)<br>Cr <sup>3+</sup> (636.0, 655.5, 684.0) | 559.5 |  |
| 54-52     | 0.35 | 0.38 | white | Fe <sup>3+</sup> (378.0, 417.0) Co <sup>2+</sup> (595.5, 649.5)<br>Cr <sup>3+</sup> (637.5, 655.5, 684.0) | 558.0 |  |
| <b>N3</b> |      |      |       |                                                                                                           |       |  |
| 54-4      | 0.38 | 0.38 | white | Fe <sup>3+</sup> (375.0, 382.5, 420.0)                                                                    | 730.5 |  |
| 54-6      | 0.38 | 0.38 | white | Fe <sup>3+</sup> (379.5, 418.5)                                                                           | 727.5 |  |
| <b>N4</b> |      |      |       |                                                                                                           |       |  |
| 55-17     | 0.35 | 0.38 | white | Fe <sup>2+</sup> (1066.5) Fe-Mn complex (418.5)                                                           | 555.0 |  |

### Silver yellow

| Sample     | x    | y    | Colour          | SPR peak position & FWHM ( $\pm 1.5$ nm) | Average particle radius R (nm) | 2 <sup>nd</sup> peak present between 380-450 nm in absorbance spectrum? |
|------------|------|------|-----------------|------------------------------------------|--------------------------------|-------------------------------------------------------------------------|
| <b>SY1</b> |      |      |                 |                                          |                                |                                                                         |
| 54-4       | 0.42 | 0.44 | greenish-yellow | 418.5 & 27.0                             | 4.8                            | no                                                                      |
| 54-6       | 0.42 | 0.43 | greenish-yellow | 415.5 & 22.5                             | 5.7                            | no                                                                      |
| 54-34      | 0.45 | 0.46 | greenish-yellow | 418.8 & 31.0                             | 4.2                            | no                                                                      |
| 54-42      | 0.42 | 0.45 | greenish-yellow | 417.0 & 29.0                             | 4.4                            | no                                                                      |
| 54-51      | 0.42 | 0.45 | greenish-yellow | 417.0 & 30.0                             | 4.3                            | no                                                                      |
| <b>SY2</b> |      |      |                 |                                          |                                |                                                                         |
| 54-2       | 0.48 | 0.46 | yellow          | 417.0 & 36.0                             | 3.6                            | yes (weak band)                                                         |
| 54-8       | 0.48 | 0.47 | yellow          | 419.3 & 44.5                             | 2.9                            | yes (weak band)                                                         |
| <b>SY3</b> |      |      |                 |                                          |                                |                                                                         |

|                                                                  |      |      |                 |              |     |                     |
|------------------------------------------------------------------|------|------|-----------------|--------------|-----|---------------------|
| 54-25                                                            | 0.44 | 0.47 | greenish-yellow | 420.0 & 64.5 | 2.0 | yes (stronger band) |
| 55-3                                                             | 0.44 | 0.49 | greenish-yellow | 417.8 & 57.5 | 2.2 | yes (stronger band) |
| 55-5                                                             | 0.48 | 0.49 | greenish-yellow | 424.5 & 75.0 | 1.8 | yes (stronger band) |
| 55-7                                                             | 0.45 | 0.50 | greenish-yellow | 422.0 & 64.0 | 2.1 | yes (stronger band) |
| 55-23                                                            | 0.46 | 0.49 | greenish-yellow | 419.8 & 63.5 | 2.0 | yes (stronger band) |
| 55-28                                                            | 0.48 | 0.49 | greenish-yellow | 424.8 & 72.5 | 1.8 | yes (stronger band) |
| <b>SY4</b>                                                       |      |      |                 |              |     |                     |
| 54-12                                                            | 0.56 | 0.43 | orange          | 424.5 & 54.0 | 2.5 | no                  |
| 54-15                                                            | 0.56 | 0.43 | orange          | 427.5 & 54.5 | 2.5 | no                  |
| 54-24                                                            | 0.55 | 0.44 | orange          | 428.0 & 74.0 | 1.8 | no                  |
| 54-28                                                            | 0.54 | 0.44 | orange          | 427.5 & 75.0 | 1.8 | no                  |
| 54-29                                                            | 0.55 | 0.44 | orange          | 430.5 & 70.5 | 1.9 | no                  |
| 54-39                                                            | 0.58 | 0.41 | orange          | 429.0 & 67.0 | 2.0 | no                  |
| 54-45                                                            | 0.56 | 0.42 | orange          | 427.5 & 73.5 | 1.8 | no                  |
| 54-50                                                            | 0.57 | 0.42 | orange          | 433.5 & 69.0 | 2.0 | no                  |
| 54-52                                                            | 0.56 | 0.42 | orange          | 426.0 & 69.0 | 1.9 | no                  |
| <b>Other sites</b>                                               |      |      |                 |              |     |                     |
| <b><i>Covento de cristo (Tomar, Portugal) – mixed alkali</i></b> |      |      |                 |              |     |                     |
| O3                                                               | 0.46 | 0.45 | greenish-yellow | 418.8 & 31.9 | 4.1 | no                  |
| O5                                                               | 0.59 | 0.39 | orange          | 477.0 & 86.2 | 1.9 | yes (weak band)     |
| O13                                                              | 0.49 | 0.49 | yellow          | 418.5 & 29.0 | 4.5 | no                  |
| <b><i>Avila and Palencia (Spain) - HLLA</i></b>                  |      |      |                 |              |     |                     |
| Avi15                                                            | 0.37 | 0.42 | yellow-green    | 411.7 & 36.4 | 3.4 | no                  |
| Avi16                                                            | 0.45 | 0.26 | purplish-pink   | 503.7 & 86.0 | 2.2 | yes (weak band)     |
| Pal15                                                            | 0.43 | 0.47 | greenish-yellow | 420.8 & 48.1 | 2.7 | no                  |
| <b><i>Bruges (HLLA1)</i></b>                                     |      |      |                 |              |     |                     |
| A6s3                                                             | 0.44 | 0.44 | yellow          | 435.0 & 73.3 | 1.9 | no                  |
| A6s7                                                             | 0.42 | 0.44 | yellow          | 427.5 & 23.0 | 5.9 | yes (weak band)     |
| A6s27                                                            | 0.49 | 0.47 | yellow          | 438.0 & 37.0 | 3.8 | yes (weak band)     |
| B1s15                                                            | 0.40 | 0.42 | yellow          | 421.5 & 22.0 | 6.0 | yes (weak band)     |
| B4s26                                                            | 0.48 | 0.47 | yellow          | 423.0 & 47.5 | 2.8 | no                  |
| C3s37                                                            | 0.49 | 0.47 | yellow          | 418.5 & 71.0 | 1.8 | no                  |
| C6s6                                                             | 0.50 | 0.47 | yellow          | 435.0 & 55.5 | 2.5 | no                  |
| <b><i>Bruges (HLLA2)</i></b>                                     |      |      |                 |              |     |                     |
| A3s5                                                             | 0.39 | 0.40 | white           | 417.0 & 16.0 | 8.0 | yes (weak band)     |

C3s39      0.46 0.46 yellow      423.0 & 36.5      3.6      no

**Supplementary Table2. SEM-EDX analysis**

| <b>Pot-coloured / green</b>                               |                  |                                |                                |                   |                                |                  |     |                   |                  |     |      |     |                 |                               |
|-----------------------------------------------------------|------------------|--------------------------------|--------------------------------|-------------------|--------------------------------|------------------|-----|-------------------|------------------|-----|------|-----|-----------------|-------------------------------|
| Sample                                                    | SiO <sub>2</sub> | Al <sub>2</sub> O <sub>3</sub> | Fe <sub>2</sub> O <sub>3</sub> | Cu <sub>2</sub> O | Cr <sub>2</sub> O <sub>3</sub> | TiO <sub>2</sub> | MnO | Na <sub>2</sub> O | K <sub>2</sub> O | MgO | CaO  | Cl  | SO <sub>3</sub> | P <sub>2</sub> O <sub>5</sub> |
| <b>Bruges</b>                                             |                  |                                |                                |                   |                                |                  |     |                   |                  |     |      |     |                 |                               |
| B1s4                                                      | 70.6             | 1.6                            | 0.1                            | 0.3               | 0.7                            | n.d              | n.d | 14.4              | 0.9              | n.d | 10.3 | 0.8 | 0.4             | n.d                           |
| <b>Flashed / red</b>                                      |                  |                                |                                |                   |                                |                  |     |                   |                  |     |      |     |                 |                               |
| Sample                                                    | SiO <sub>2</sub> | Al <sub>2</sub> O <sub>3</sub> | Fe <sub>2</sub> O <sub>3</sub> | Cu <sub>2</sub> O | Cr <sub>2</sub> O <sub>3</sub> | TiO <sub>2</sub> | MnO | Na <sub>2</sub> O | K <sub>2</sub> O | MgO | CaO  | Cl  | SO <sub>3</sub> | P <sub>2</sub> O <sub>5</sub> |
| <b>Dendermonde (potash)</b>                               |                  |                                |                                |                   |                                |                  |     |                   |                  |     |      |     |                 |                               |
| 1                                                         | -                | -                              | -                              | -                 | -                              | -                | -   | -                 | -                | -   | -    | -   | -               | -                             |
| 2                                                         | 51.7             | 2.3                            | 0.6                            | n.d               | n.d                            | 0.5              | 1.5 | 1.2               | 17.7             | 4.8 | 16.6 | 0.4 | n.d             | 2.9                           |
| <b>Bruges</b>                                             |                  |                                |                                |                   |                                |                  |     |                   |                  |     |      |     |                 |                               |
| <b>HLLA1</b>                                              |                  |                                |                                |                   |                                |                  |     |                   |                  |     |      |     |                 |                               |
| B6s36                                                     | 59.6             | 3.3                            | 0.6                            | n.d               | n.d                            | 0.3              | 0.6 | 2.7               | 3.7              | 3.5 | 21.5 | 0.7 | 0.3             | 3.1                           |
| B6s37                                                     | 58.5             | 3.5                            | 0.7                            | n.d               | n.d                            | 0.4              | 0.6 | 2.6               | 4.4              | 3.1 | 22.3 | 0.6 | 0.2             | 3.1                           |
| <b>HLLA2</b>                                              |                  |                                |                                |                   |                                |                  |     |                   |                  |     |      |     |                 |                               |
| A6s50                                                     | 60.5             | 3.7                            | 0.6                            | n.d               | n.d                            | 0.6              | 1.0 | 1.6               | 5.7              | 2.9 | 20.0 | 0.4 | 0.5             | 2.6                           |
| C6s54                                                     | 60.8             | 3.8                            | 0.6                            | n.d               | n.d                            | 0.6              | 0.8 | 1.6               | 5.7              | 2.9 | 20.1 | 0.4 | 0.4             | 2.5                           |
| <b>Bruges (soda)</b>                                      |                  |                                |                                |                   |                                |                  |     |                   |                  |     |      |     |                 |                               |
| A3s2                                                      | 58.6             | 3.7                            | 0.5                            | n.d               | n.d                            | 0.2              | 0.6 | 2.6               | 4.6              | 3.2 | 22.0 | 0.6 | 0.2             | 3.3                           |
| <b>Glashütte Lamberts (soda)</b>                          |                  |                                |                                |                   |                                |                  |     |                   |                  |     |      |     |                 |                               |
| 1001U Hell                                                | -                | -                              | -                              | -                 | -                              | -                | -   | -                 | -                | -   | -    | -   | -               | -                             |
| 1001U Mittel                                              | -                | -                              | -                              | -                 | -                              | -                | -   | -                 | -                | -   | -    | -   | -               | -                             |
| <b>Silver yellow</b>                                      |                  |                                |                                |                   |                                |                  |     |                   |                  |     |      |     |                 |                               |
| Sample                                                    | SiO <sub>2</sub> | Al <sub>2</sub> O <sub>3</sub> | Fe <sub>2</sub> O <sub>3</sub> | Cu <sub>2</sub> O | Cr <sub>2</sub> O <sub>3</sub> | TiO <sub>2</sub> | MnO | Na <sub>2</sub> O | K <sub>2</sub> O | MgO | CaO  | Cl  | SO <sub>3</sub> | P <sub>2</sub> O <sub>5</sub> |
| <b>Covento de cristo (Tomar, Portugal) – mixed alkali</b> |                  |                                |                                |                   |                                |                  |     |                   |                  |     |      |     |                 |                               |
| O3                                                        | [Delgado         | 2011]                          |                                |                   |                                |                  |     |                   |                  |     |      |     |                 |                               |
| O5                                                        | [Delgado         | 2011]                          |                                |                   |                                |                  |     |                   |                  |     |      |     |                 |                               |
| O13                                                       | [Delgado         | 2011]                          |                                |                   |                                |                  |     |                   |                  |     |      |     |                 |                               |
| <b>Avila and Palencia (Spain) - HLLA</b>                  |                  |                                |                                |                   |                                |                  |     |                   |                  |     |      |     |                 |                               |

Avi15 [Molina 2013]  
 Avi16 [Molina 2013]  
 Pal15 [Molina 2013]

***Bruges (HLLA)***

|       |      |     |     |     |     |     |     |     |     |     |      |     |     |     |
|-------|------|-----|-----|-----|-----|-----|-----|-----|-----|-----|------|-----|-----|-----|
| A6s3  | 59.6 | 4.0 | 0.8 | n.d | n.d | 0.5 | 0.6 | 1.5 | 5.6 | 2.8 | 21.1 | 0.4 | 0.3 | 2.8 |
| A6s7  | 60.5 | 4.2 | 0.7 | n.d | n.d | 0.3 | 0.5 | 1.6 | 5.4 | 2.9 | 20.3 | 0.4 | 0.4 | 2.8 |
| A6s27 | 60.1 | 4.1 | 0.8 | n.d | n.d | 0.4 | 0.6 | 1.6 | 5.6 | 2.9 | 20.4 | 0.4 | 0.3 | 2.8 |
| B1s15 | 60.4 | 4.3 | 0.8 | n.d | n.d | 0.4 | 0.5 | 1.8 | 5.3 | 3.0 | 19.9 | 0.5 | 0.2 | 2.8 |
| B4s26 | 58.7 | 4.3 | 0.6 | n.d | n.d | 0.5 | 0.6 | 1.8 | 5.8 | 2.8 | 21.4 | 0.5 | 0.3 | 2.9 |
| C3s37 | 59.0 | 4.1 | 0.6 | n.d | n.d | 0.4 | 0.7 | 2.0 | 5.8 | 2.7 | 21.2 | 0.5 | 0.2 | 2.7 |
| C6s6  | 59.8 | 4.1 | 0.8 | n.d | n.d | 0.4 | 0.6 | 1.7 | 5.6 | 2.9 | 20.7 | 0.4 | 0.2 | 2.8 |
